# Supplementary material for: Fission-fusion dynamics over large distances in raven non-breeders
Source: PubMed Central journal article supplement (PMC5428508; doi:10.1038/s41598-017-00404-4), 2017-03-23
Supplement: 41598_2017_404_MOESM1_ESM.pdf [file 41598_2017_404_MOESM1_ESM.pdf]

## Supplementary Information for

### Fission-fusion dynamics over large distances in raven non-breeders

Matthias-Claudio Loretto<sup>1,2\*</sup>, Richard Schuster<sup>3,4</sup>, Christian Itty<sup>5</sup>, Pascal Marchand<sup>5</sup>, Fulvio Genero<sup>6</sup>,  
Thomas Bugnyar<sup>1,2</sup>

<sup>1</sup> Department of Cognitive Biology, University of Vienna, Althanstrasse 14, A-1090 Vienna, Austria

<sup>2</sup> Konrad Lorenz Forschungsstelle, Core Facility for Behaviour and Cognition, University of Vienna, Fischerau 11, A-4645 Grünau im Almtal, Austria

<sup>3</sup> Department of Forest and Conservation Sciences, University of British Columbia, 3041 – 2424 Main Mall, Vancouver, B.C. Canada V6T 1Z4

<sup>4</sup> Department of Biology, 1125 Colonel By Drive, Carleton University, Ottawa K1S 5B6, Canada

<sup>5</sup> Office National de la Chasse et de Faune sauvage, Délégation Régionale Occitanie, Actisud Bâtiment 12, 18 rue Jean Perrin, F-31100 Toulouse, France

<sup>6</sup> Riserva naturale regionale del Lago di Cornino, I-33030 Forgaria nel Friuli, Udine, Italy

\*Corresponding author

E-mail: [mail@m-loretto.com](mailto:mail@m-loretto.com)

**This file includes:** Table S1

Table S2

Table S3

Table S4

Figure S1 a, b

**Table S1:** General information about GPS-tagged non-breeding ravens (ID) trapped in Austria. All individuals were captured on different days. The data collection for most ravens already stopped before end of November 2016 due to (i) technical reasons (individuals were observed with the GPS logger but no data were transmitted), (ii) removal of the GPS-logger by the raven in one case and (iii) predation in another case.

| <b>ID</b>  | <b>fledged<br/>in</b> | <b>sex</b> | <b>date of<br/>tagging</b> | <b>last GPS fix</b> | <b># days<br/>with data</b> | <b># GPS fixes</b> | <b>mean # of fixes<br/>per day</b> |
|------------|-----------------------|------------|----------------------------|---------------------|-----------------------------|--------------------|------------------------------------|
| <b>C8</b>  | 2011+                 | f          | 20/04/2013                 | 13/04/2016          | 600                         | 3604               | 6.0                                |
| <b>C5</b>  | 2012                  | f          | 29/03/2013                 | 07/10/2016          | 651                         | 2784               | 4.3                                |
| <b>C6</b>  | 2012                  | f          | 14/04/2013                 | 30/11/2016          | 1317                        | 12753              | 9.7                                |
| <b>C10</b> | 2013                  | f          | 01/09/2013                 | 24/04/2014          | 233                         | 1937               | 8.3                                |
| <b>C21</b> | 2012+                 | m          | 16/11/2013                 | 26/11/2016          | 1055                        | 11483              | 10.9                               |
| <b>C11</b> | 2012                  | m          | 03/09/2013                 | 27/07/2016          | 932                         | 7190               | 7.7                                |
| <b>C12</b> | 2012                  | m          | 31/10/2013                 | 20/05/2015          | 536                         | 5106               | 9.5                                |
| <b>C22</b> | 2012                  | m          | 15/11/2013                 | 23/06/2014          | 221                         | 2271               | 10.3                               |
| <b>C9</b>  | 2013                  | m          | 16/08/2013                 | 23/01/2014          | 158                         | 1469               | 9.3                                |

**Table S2:** General information about GPS-tagged non-breeding ravens (ID) in France. Most individuals were captured on different days. The data collection for some ravens already stopped before end of November 2016 due to (i) technical reasons in one case (individuals were observed with the GPS logger but no data were transmitted), (ii) removal of the GPS-logger by the raven (n=3) and (iii) death through predation (n=1), illegal hunting (n=1) and unknown (n=1).

| <b>ID</b>    | <b>fledged in</b> | <b>translocated [km]</b> | <b>date of tagging</b> | <b>last GPS fix</b> | <b># days with data</b> | <b># GPS fixes</b> | <b>mean # of fixes per day</b> |
|--------------|-------------------|--------------------------|------------------------|---------------------|-------------------------|--------------------|--------------------------------|
| <b>f10.1</b> | 2015              | 0                        | 31/08/2015             | 27/11/2015          | 89                      | 1126               | 12.7                           |
| <b>f10.2</b> | 2015+             | 0                        | 30/11/2015             | 30/11/2016          | 367                     | 4168               | 11.4                           |
| <b>f24</b>   | 2015              | 0                        | 31/08/2015             | 30/11/2016          | 452                     | 4658               | 10.3                           |
| <b>f25</b>   | 2014              | 0                        | 09/09/2015             | 08/10/2016          | 396                     | 4731               | 11.9                           |
| <b>f29.2</b> | 2015              | 0                        | 26/07/2016             | 30/11/2016          | 128                     | 1524               | 11.9                           |
| <b>f43</b>   | 2016              | 0                        | 24/09/2016             | 30/11/2016          | 68                      | 842                | 12.4                           |
| <b>f45</b>   | 2016              | 0                        | 24/09/2016             | 30/11/2016          | 68                      | 858                | 12.6                           |
| <b>fG12</b>  | 2014              | 0                        | 10/04/2015             | 29/11/2016          | 577                     | 4600               | 8.0                            |
| <b>fG16</b>  | 2015              | 0                        | 30/11/2015             | 30/11/2016          | 367                     | 4619               | 12.6                           |
| <b>fG17</b>  | 2015              | 0                        | 26/07/2016             | 30/11/2016          | 128                     | 1608               | 12.6                           |
| <b>f39</b>   | 2015              | 24.8                     | 31/10/2015             | 07/05/2016          | 190                     | 2332               | 12.3                           |
| <b>f23</b>   | 2015              | 40                       | 24/09/2015             | 30/11/2016          | 434                     | 5448               | 12.6                           |
| <b>f40.1</b> | 2015              | 62.5                     | 31/10/2015             | 19/12/2015          | 50                      | 583                | 11.7                           |
| <b>f40.2</b> | 2015              | 62.5                     | 06/01/2016             | 30/11/2016          | 330                     | 4329               | 13.1                           |
| <b>f26</b>   | 2015              | 160                      | 14/08/2015             | 20/11/2016          | 465                     | 5377               | 11.6                           |
| <b>f27</b>   | 2014              | 160                      | 03/08/2015             | 04/12/2015          | 123                     | 1589               | 12.9                           |
| <b>f29.1</b> | 2015              | 160                      | 10/12/2015             | 07/05/2016          | 150                     | 1848               | 12.3                           |
| <b>f28</b>   | 2015              | 240                      | 01/09/2015             | 30/11/2016          | 457                     | 5504               | 12.0                           |





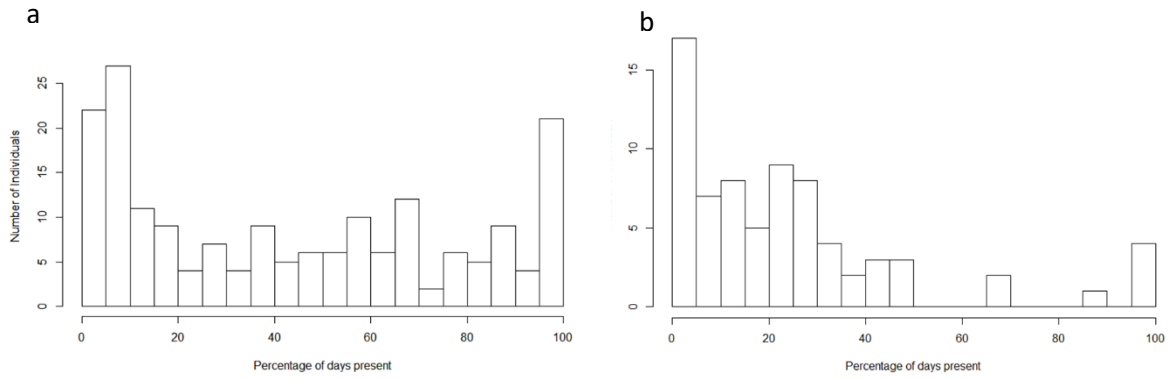

**Figure S1:** The histograms show for each marked raven the percentage of days observed between trapping and last observation at a) the Austrian study site (n=185 individuals) and b) the Italian study site (n=52 individuals).
